# Supplementary material for: High-efficiency photocatalysis in Ca–Cr doped BiFeO3 nanoparticles via bandgap tuning
Source: Royal Society of Chemistry journal article supplement (doi:10.1039/d5ra06225j), 2025-01-01
Supplement: d5ra06225j1.pdf [file d5ra06225j1.pdf]

## Supplementary Information

### High-Efficiency Photocatalysis in Ca–Cr Doped BiFeO<sub>3</sub> Nanoparticles via Bandgap tuning

**Authors :** Anika Rahman Riya <sup>a,†</sup>, Abrar Daiyan <sup>a,†</sup>, Mehedi Hasan Prince <sup>a,b,†</sup>, Troyee Mitra Aishi <sup>a,c,†</sup>, Tinni Dey Prome <sup>a</sup>, Md. Abdullah Zubair <sup>d</sup>, Md. Fakhrul Islam <sup>d</sup>, Takian Fakhrul <sup>a,\*</sup>

**Affiliations:**

<sup>a</sup> Department of Materials and Metallurgical Engineering, Bangladesh University of Engineering and Technology (BUET), Dhaka, 1000, Bangladesh

<sup>b</sup> Department of Materials Science & Engineering, Rensselaer Polytechnic Institute (RPI), NY, 12180, USA

<sup>c</sup> Department of Chemical Engineering, Northeastern University, MA, 02115, USA

<sup>d</sup> Department of Nanomaterials and Ceramic Engineering, Bangladesh University of Engineering and Technology (BUET), Dhaka, 1000, Bangladesh

\* Corresponding author. Email: [takianf@mme.buet.ac.bd](mailto:takianf@mme.buet.ac.bd)

† Anika Rahman Riya, Abrar Daiyan, Mehedi Hasan Prince, Troyee Mitra Aishi contributed equally to this work

### **Supplementary information captions:**

Figure S1: EDS spectra from multiple points of the BFO sample

Figure S2: EDS spectra from multiple points of the BCFO sample

Figure S3: EDS spectra from multiple points of the BCFOCr1 sample

Figure S4: EDS spectra from multiple points of the BCFOCr3 sample

Figure S5: EDS spectra from multiple points of the BCFOCr5 sample

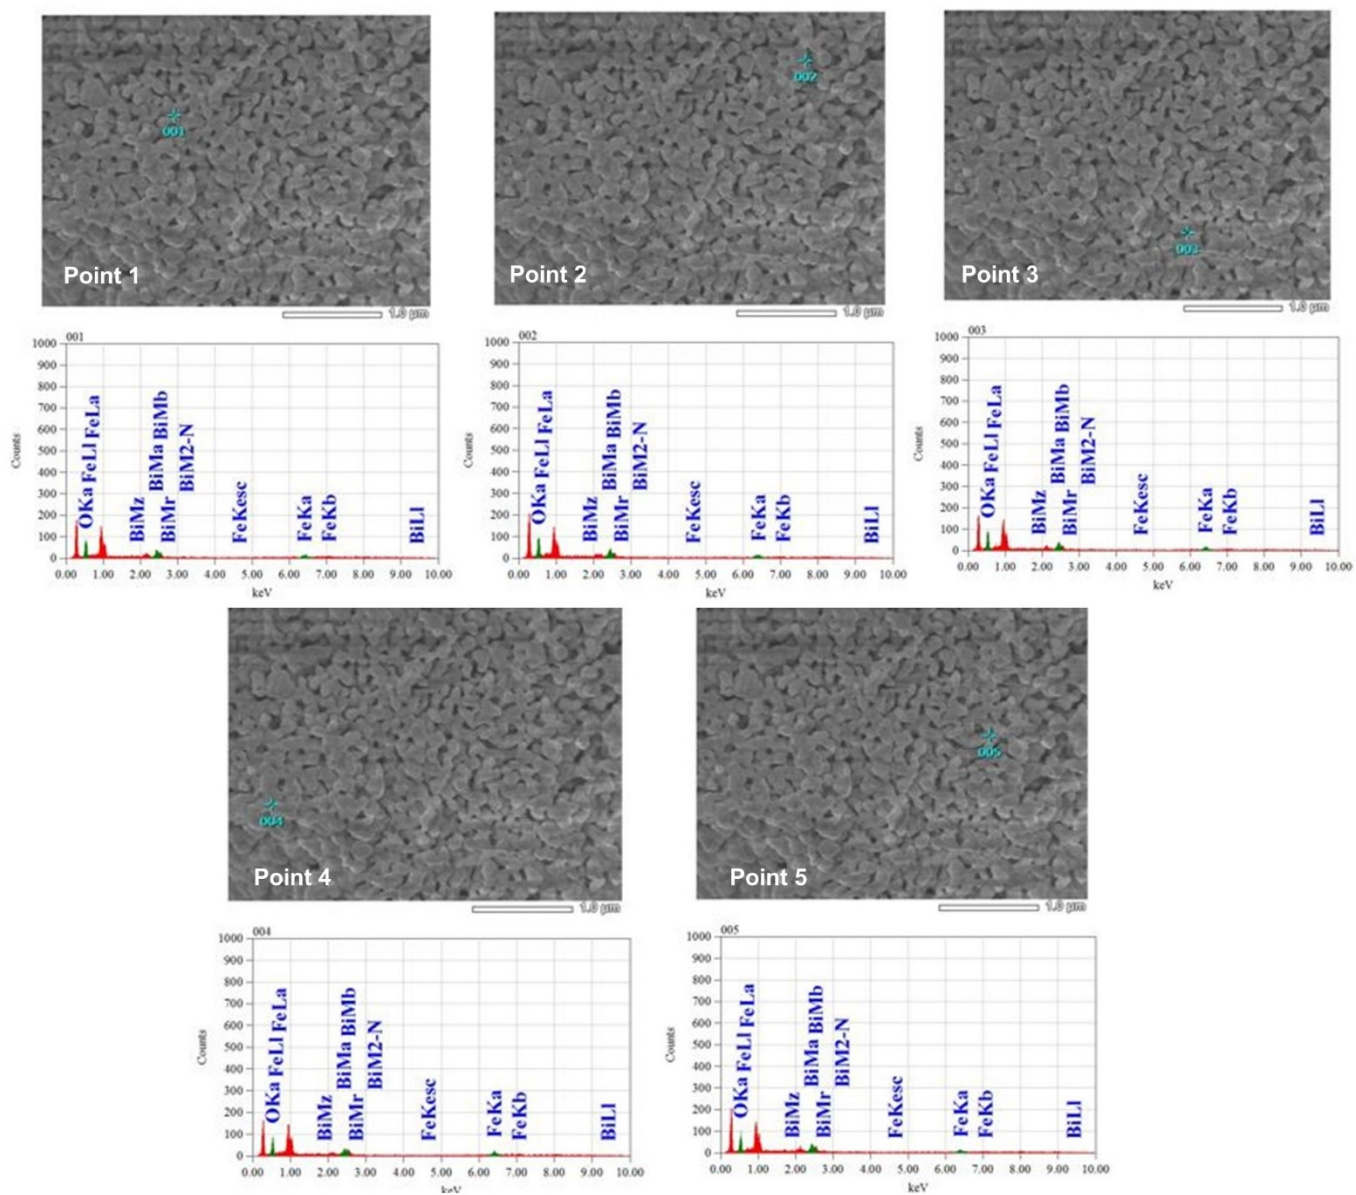

Figure S1: EDS spectra from multiple points of the BFO sample



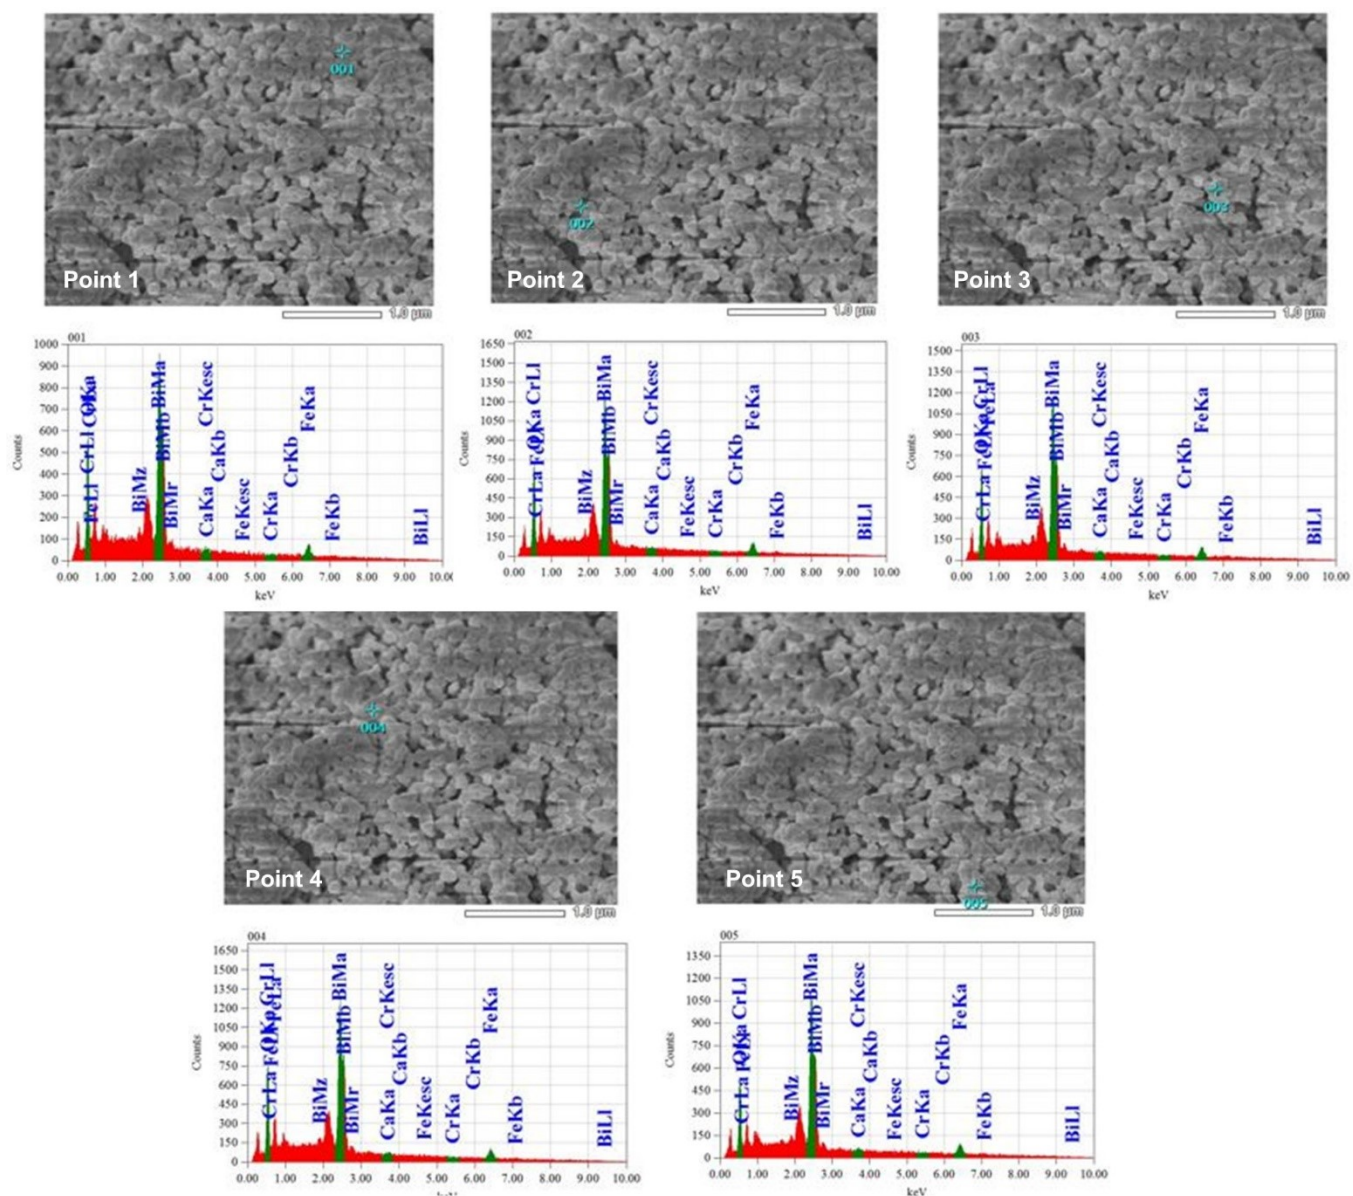

Figure S3: EDS spectra from multiple points of the BCFOCr1 sample



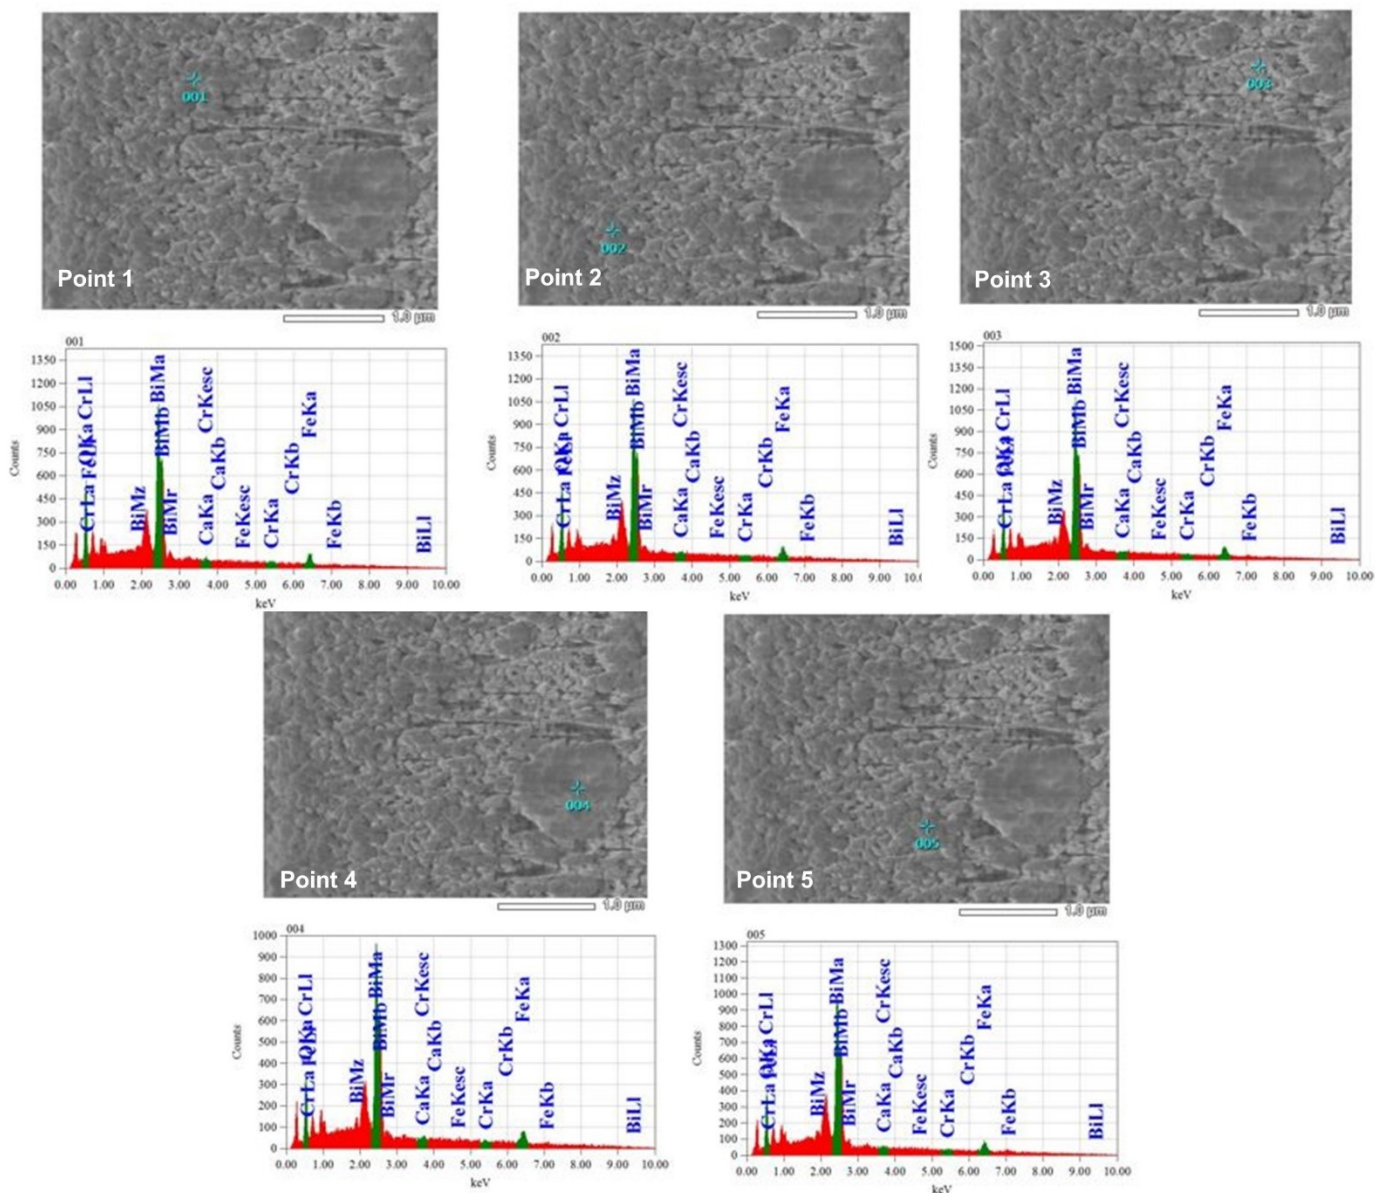

Figure S4: EDS spectra from multiple points of the BCFOCr<sub>3</sub> sample

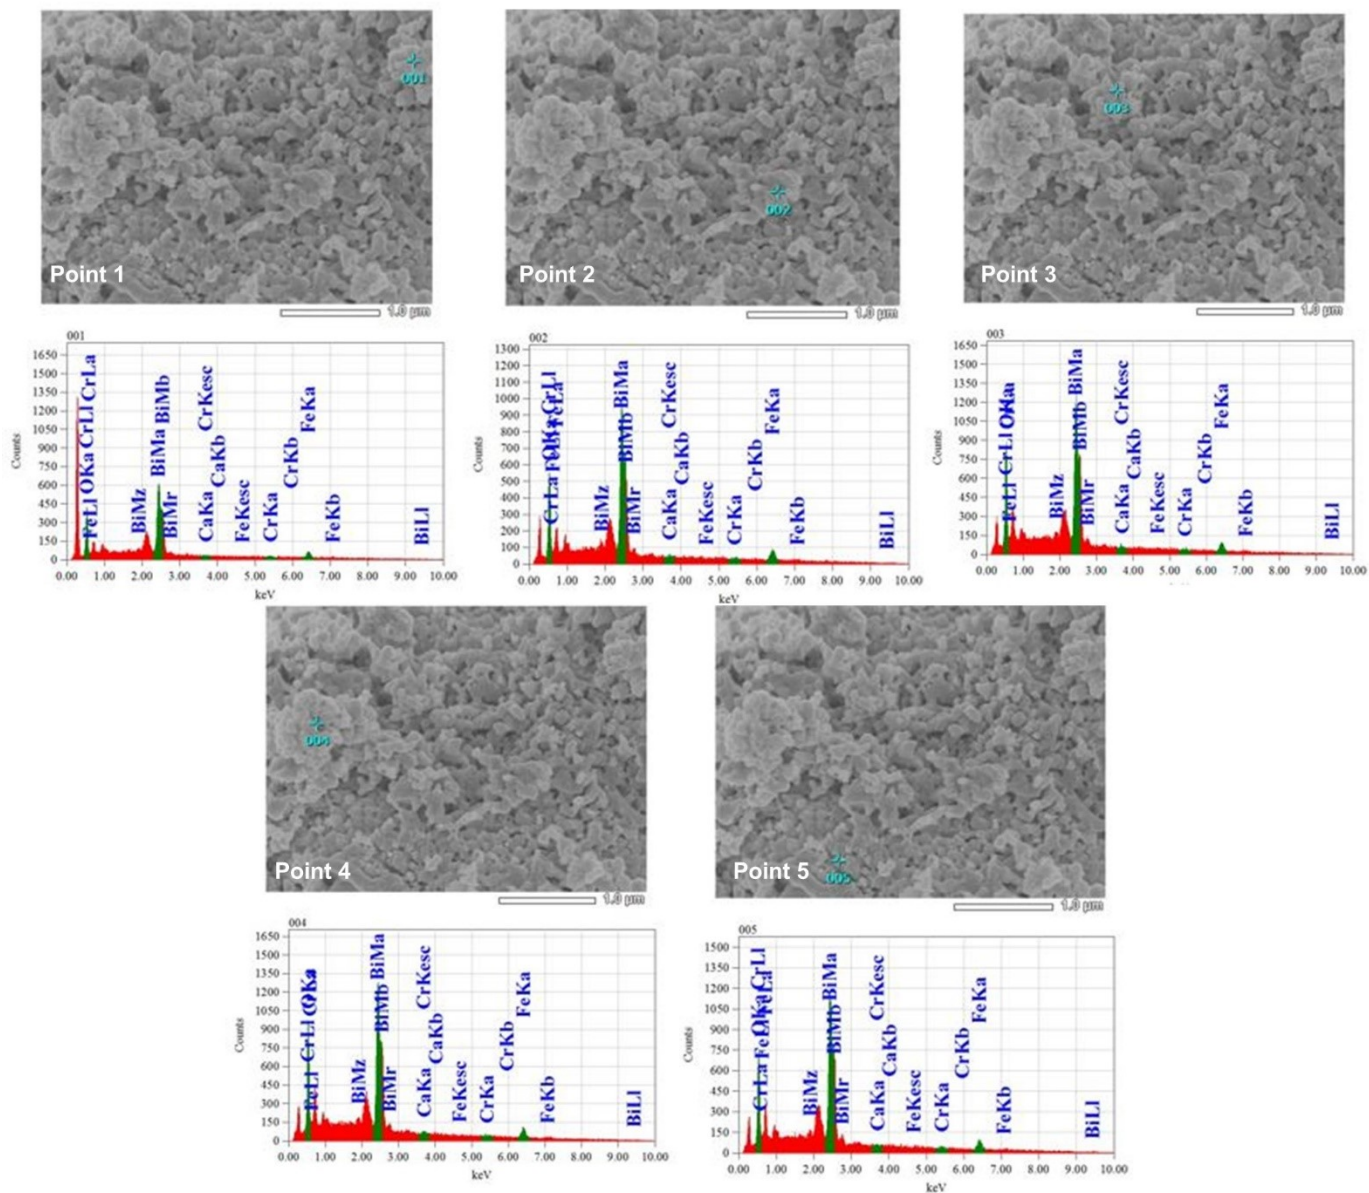

Figure S5: EDS spectra from multiple points of the BCFOCr5 sample
